# Supplementary material for: Ubiquity and seasonality of deep submesoscales in the Southern Ocean revealed by elephant seals
Source: Research Square preprint supplement (doi:10.21203/rs.3.rs-6727291/v1), 2025-06-11
Supplement: Supplementary file 1 [file 2ddc3265c3f1100e6c24b333.pdf]

Supplementary Material for  
“Ubiquity and seasonality of deep submesoscales in  
the Southern Ocean revealed by elephant seals”

Siegelman et al.

**This PDF file includes:**

Figs. S1 to S5.

**Figure S1.** Vertical sections of the inverse Richardson number ( $Ri^{-1}$ , a,d), lateral gradients of buoyancy ( $b_x$ , d,e) and the square the Brunt-Väissälä frequency ( $N^2$ , c, f) collected by instrumented elephant seals in the East (a-c) and in the South (d-f).

**Figure S2.** Distribution of the magnitude of lateral gradients of buoyancy  $|b_x|$  within the mixed layer (i.e., from the surface to 5 m above the ML, in purple), below the mixed layer (i.e., starting 10 m below the ML, in gray) and at the base of the mixed layer (i.e, between 5m above and 10 m below, in black). The left y-axis shows the histogram (solid lines), whereas the right y-axis shows the cumulative histogram (dotted lines). The strongest lateral gradients of buoyancy are found at the base of the mixed layer, likely due to internal gravity waves.

**Figure S3.** Regional seasonality of the mixed layer depth (MLD). Histograms of MLD in the a) East, b) South, c) Northwest (NW), d) Southwest (SW) colored by season. The y-axes show the number of occurrences and the dashed lines represent the median MLD depth per season, with their value on top of the y-axis. Note that in b) medians for summer and fall are equal.

**Figure S4.** Regional seasonality of the inverse Richardson number  $Ri^{-1}$ . Histograms of  $Ri^{-1}$  in the a) East, b) South, c) Northwest (NW), d) Southwest (SW) colored by season. The y-axes show the number of occurrences and the dashed lines corresponds to  $Ri^{-1} = 1$ .  $Ri^{-1} \geq 1$  is indicative of ageostrophic dynamics.

**Figure S5.** Seasonality of the rms of relative vorticity ( $\zeta$ , triangle) and  $b_x$  at 300 m (diamond) in the East region.  $\zeta$  is computed from neurOST SSH along the seals' track. 95% confidence interval are indicated by the vertical lines.  $\zeta$  and  $b_x$  have a similar seasonal evolution, suggesting that submesoscale at depth are forced by mesoscale eddies.

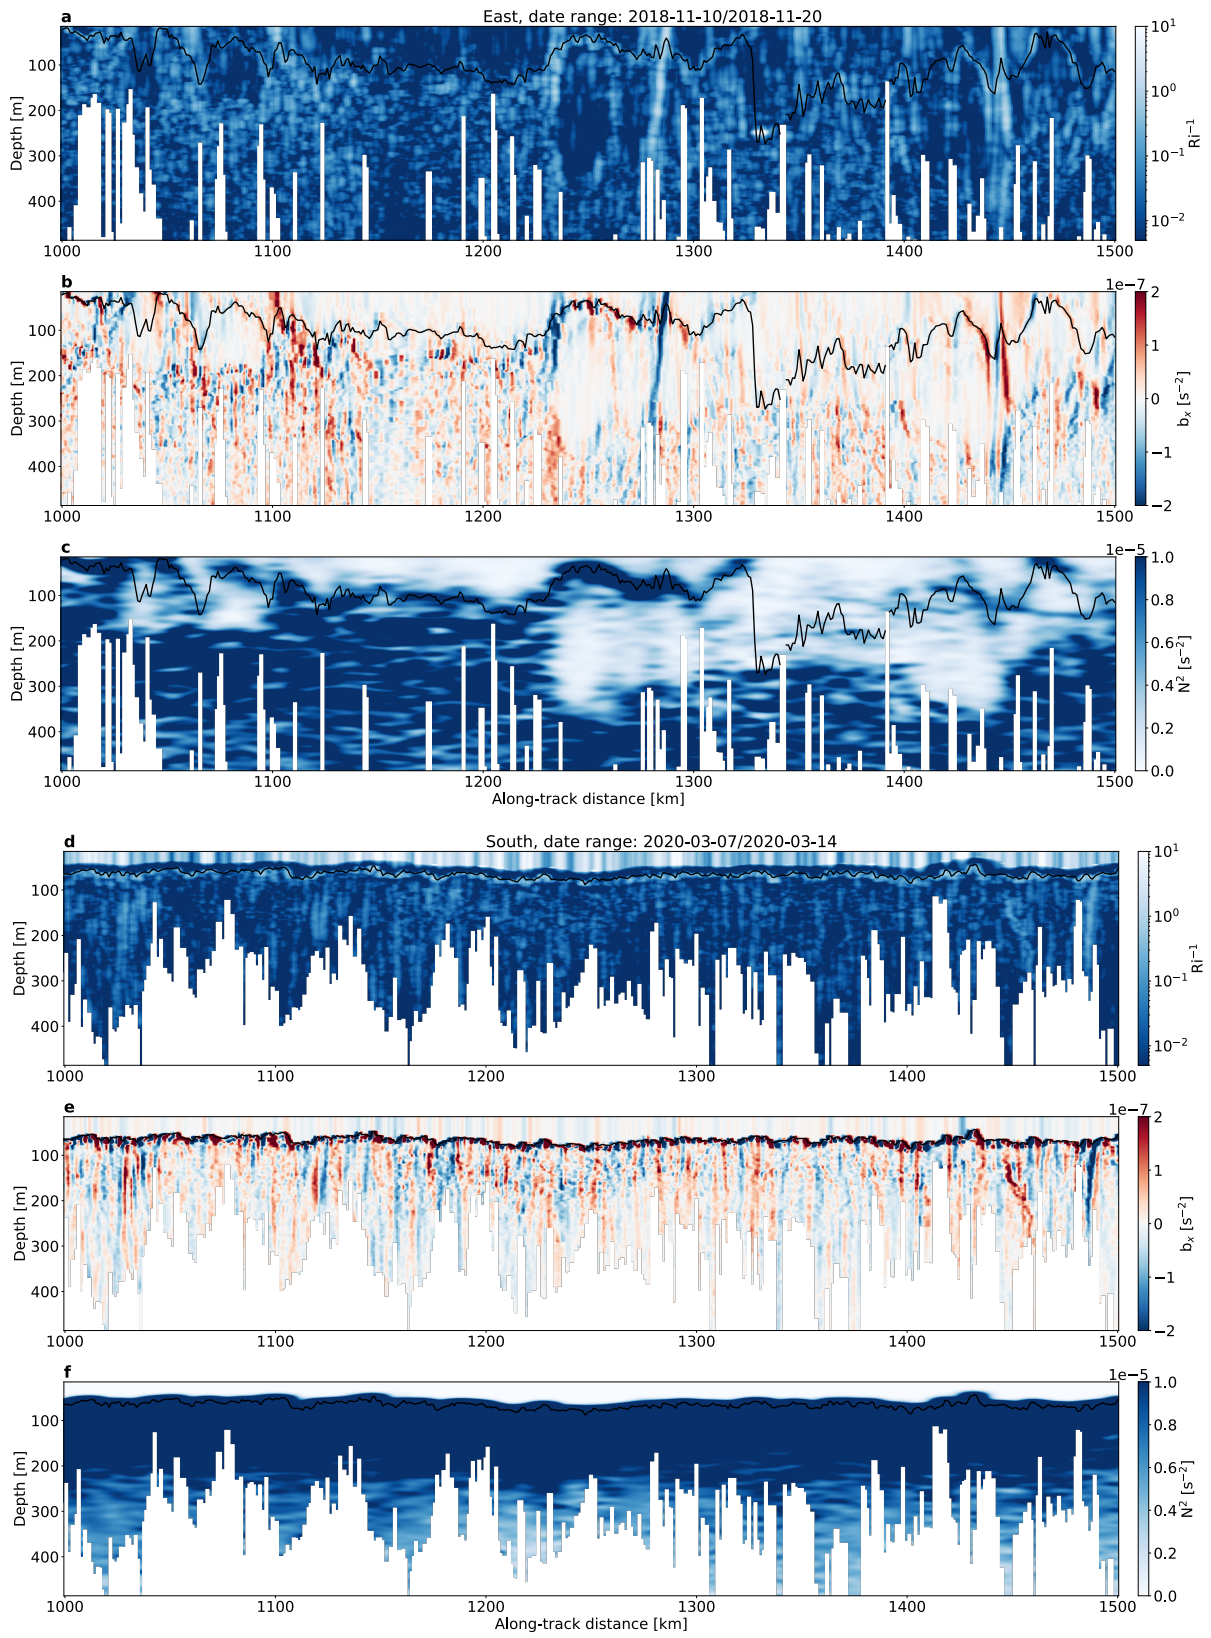

Figure 1: Vertical sections of the inverse Richardson number ( $Ri^{-1}$ , a,d), lateral gradients of buoyancy ( $b_x$ , d,e) and the square the Brunt-Väissälä frequency ( $N^2$ , c, f) collected by instrumented elephant seals in the East (a-c) and in the South (d-f).

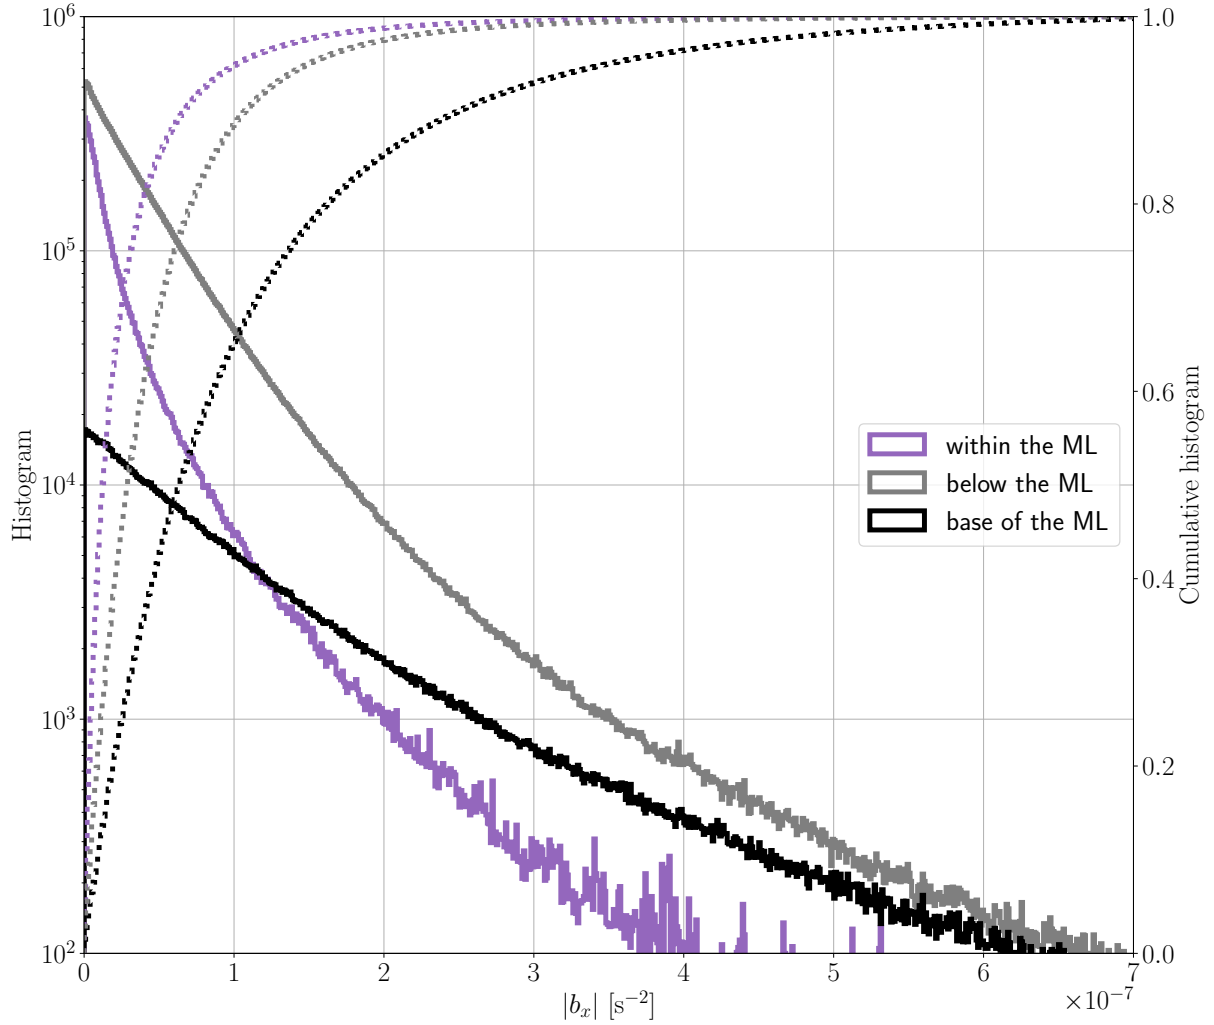

Figure 2: Distribution of the magnitude of lateral gradients of buoyancy  $|b_x|$  within the mixed layer (i.e., from the surface to 5 m above the MLD, in purple), below the mixed layer (i.e., starting 10 m below the MLD, in gray) and at the base of the mixed layer (i.e, between 5m above and 10 m below the MLD, in black). The left y-axis shows the histogram (solid lines), whereas the right y-axis shows the cumulative histogram (dotted lines). The strongest lateral gradients of buoyancy are found at the base of the mixed layer, likely due to internal gravity waves.



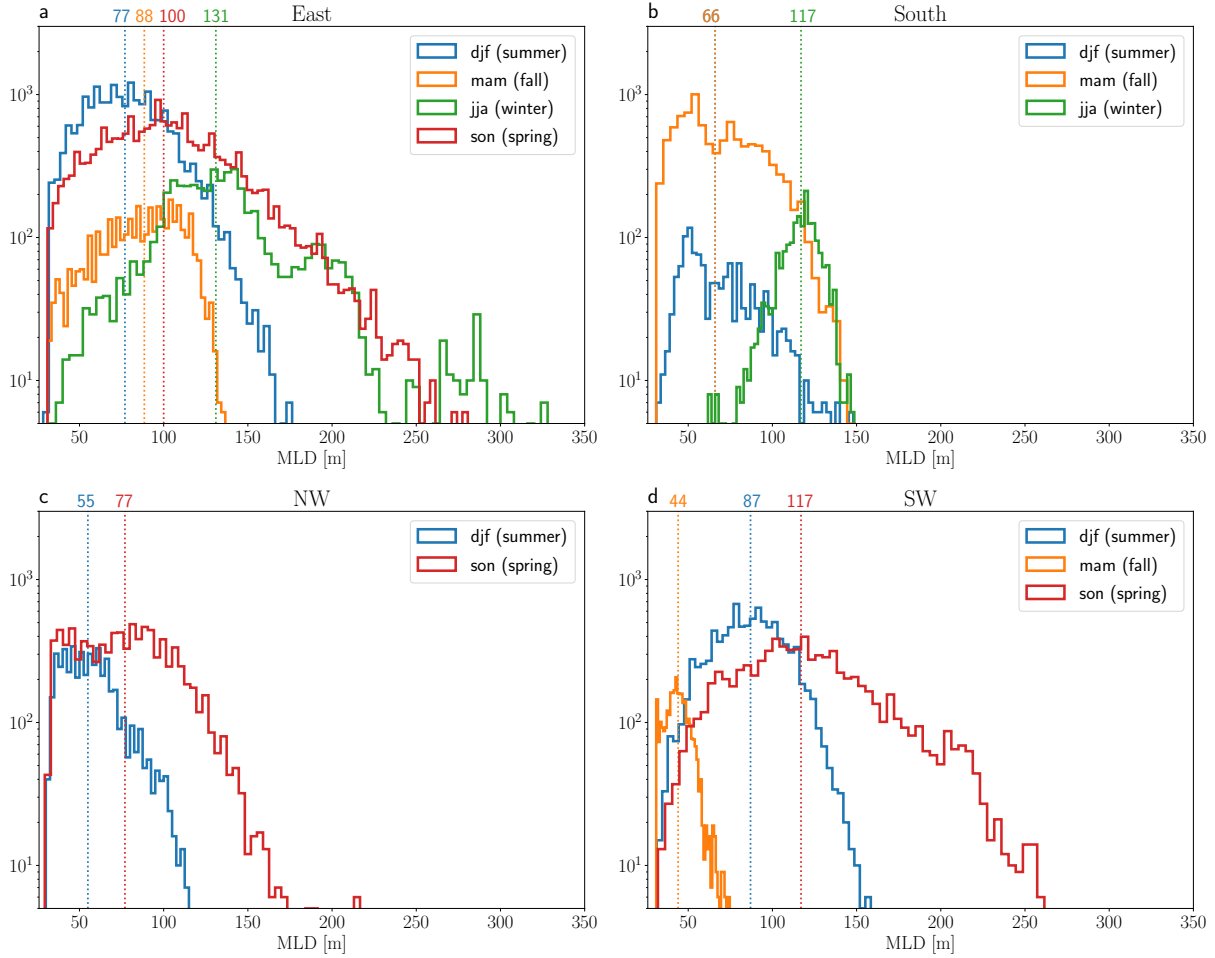

Figure 3: Regional seasonality of the mixed layer depth (MLD). Histograms of MLD in the a) East, b) South, c) Northwest (NW), d) Southwest (SW) colored by season. The y-axes show the number of occurrences and the dashed lines represent the median MLD depth per season, with their value on top of the y-axis. Note that in b) medians for summer and fall are equal.

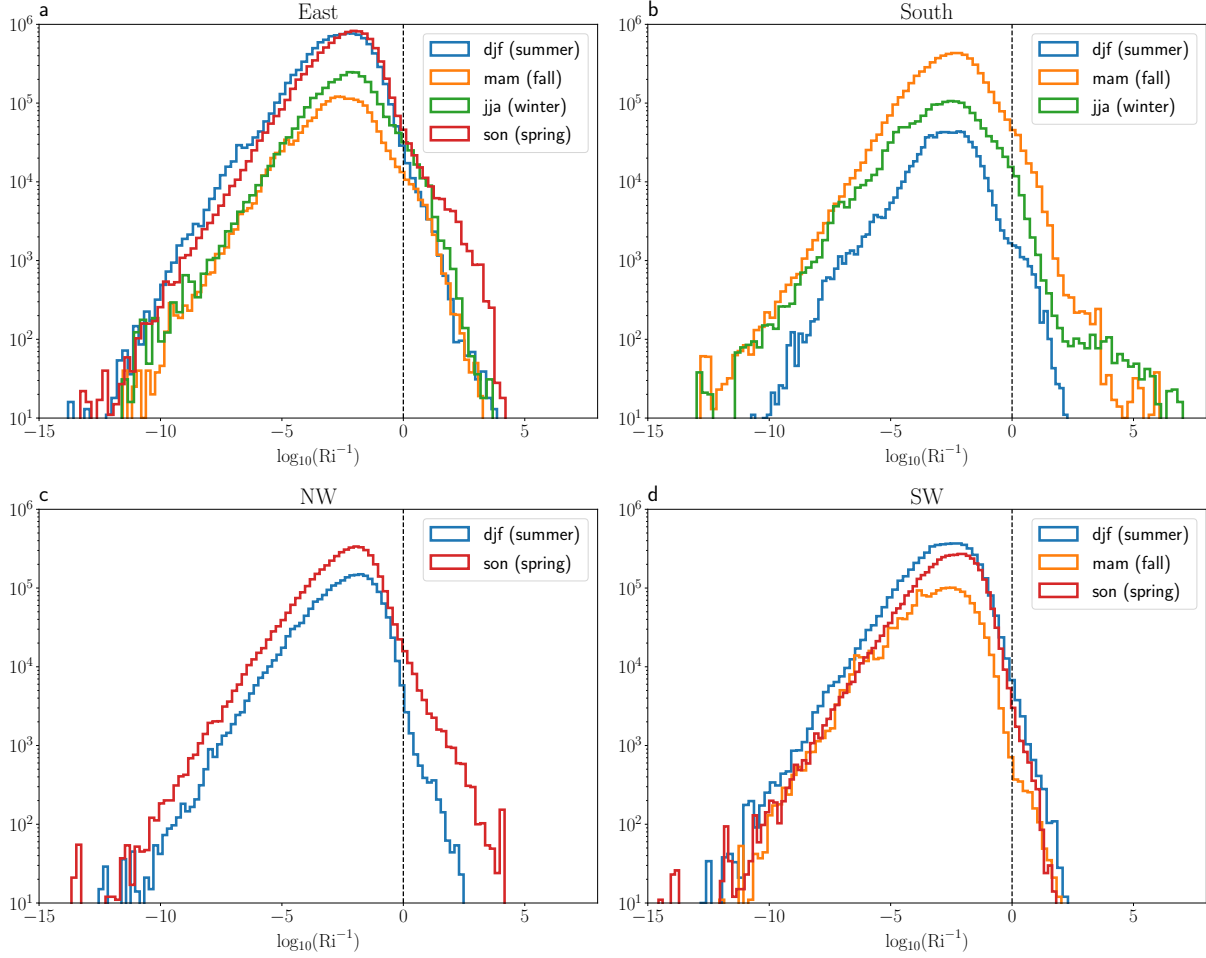

Figure 4: Regional seasonality of the inverse Richardson number  $Ri^{-1}$ . Histograms of  $Ri^{-1}$  in the a) East, b) South, c) Northwest (NW), d) Southwest (SW) colored by season. The y-axes show the number of occurrences and the dashed lines corresponds to  $Ri^{-1} = 1$ .  $Ri^{-1} \geq 1$  is indicative of ageostrophic dynamics.

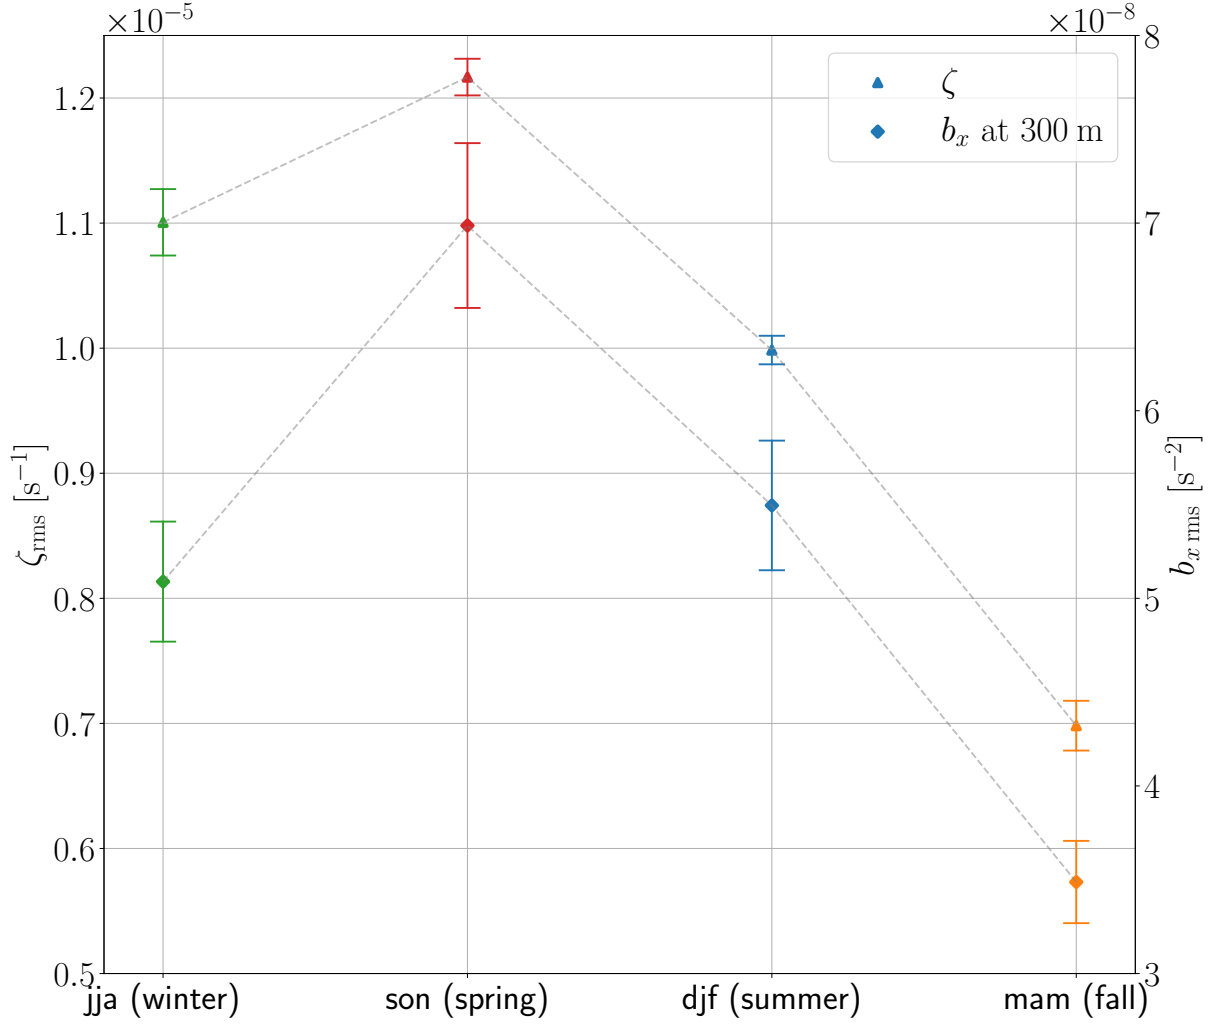

Figure 5: Seasonality of the rms of relative vorticity ( $\zeta$ , triangle) and  $b_x$  at 300 m (diamond) in the East region.  $\zeta$  is computed from neurOST SSH along the seals' track. 95% confidence interval are indicated by the vertical lines.  $\zeta$  and  $b_x$  have a similar seasonal evolution, suggesting that submesoscale at depth are forced by mesoscale eddies.
